# Supplementary material
Source: bioRxiv or medRxiv preprint supplement (https://www.medrxiv.org/highwire/filestream/94324/field_highwire_adjunct_files/6/2020.08.24.20178715-5.pdf)
Supplement: Supplementary file [file 2020.08.24.20178715-5.pdf]

**Supplementary Table 3:** GWAS summary statistics used to test genetic correlations with treatment-resistant depression (TRD) and non-TRD using linkage disequilibrium score regression (LDSC) in UKB. ADHD=attention deficit hyperactivity disorder; ASD=autism spectrum disorders;

| Trait                                      | Type of phenotype | N cases | N controls | Ethnicity                | Reference (PubMed ID) |
|--------------------------------------------|-------------------|---------|------------|--------------------------|-----------------------|
| <b>Psychiatric disorders</b>               |                   |         |            |                          |                       |
| Major depressive disorder*^                | Binary            | 45,591  | 97,674     | European                 | 29700475              |
| Depressive symptoms                        | Continuous        | 105,739 |            | European                 | 27089181              |
|                                            | Binary            | 16,471  | 58,656     |                          |                       |
| Bipolar disorder^                          | Binary            | 20,352  | 31,358     | European                 | 31043756              |
| Schizophrenia                              | Binary            | 36,989  | 113,075    | European                 | 25056061              |
| ADHD                                       | Continuous        | 17,666  |            | European                 | 27663945              |
| ASD                                        | Binary            | 18,381  | 27,969     | European                 | 30804558              |
| Anorexia nervosa^                          | Binary            | 16,992  | 55,525     | European                 | 31308545              |
| PGC cross-disorder study                   | Binary            | 33,332  | 27,888     | European                 | 23453885              |
| <b>Personality and related traits</b>      |                   |         |            |                          |                       |
| Neuroticism                                | Continuous        | 170,911 |            | European                 | 27089181              |
| Openness to experience                     | Continuous        | 17,375  |            | European                 | 21173776              |
| Conscientiousness                          | Continuous        | 17,375  |            | European                 | 21173776              |
| Subjective wellbeing                       | Continuous        | 298,420 |            | European                 | 27089181              |
| <b>Sleep-related traits</b>                |                   |         |            |                          |                       |
| Insomnia                                   | Binary            | 32,155  | 26,973     | European                 | 27992416              |
| Sleep duration                             | Continuous        | 128,266 |            | European                 | 27494321              |
| Chronotype (morningness)                   | Continuous        | 128,266 |            | European                 | 27494321              |
| <b>Cognitive and related traits</b>        |                   |         |            |                          |                       |
| Childhood IQ                               | Continuous        | 17,989  |            | European                 | 23358156              |
| Intelligence                               | Continuous        | 78,308  |            | European                 | 28530673              |
| Years of schooling                         | Continuous        | 293,723 |            | European                 | 27225129              |
| College completion                         | Continuous        | 126,559 |            | European                 | 23722424              |
| <b>Cardio-metabolic and related traits</b> |                   |         |            |                          |                       |
| LDL cholesterol                            | Continuous        | 95,454  |            | European                 | 20686565              |
| HDL cholesterol                            | Continuous        | 99,900  |            | European                 | 20686565              |
| Triglycerides                              | Continuous        | 96,598  |            | European                 | 20686565              |
| Type 2 diabetes                            | Binary            | 34,840  | 114,981    | European                 | 22885922              |
| Coronary artery disease                    | Binary            | 60,801  | 123,504    | European and south Asian | 26343387              |
| Ever smoked                                | Binary            | 41,951  | 32,102     | European                 | 20418890              |
| Obesity class 1                            | Binary            | 55,229  | 104,894    | European                 | 23563607              |
| Obesity class 2                            | Binary            | 15,334  | 97,858     | European                 | 23563607              |
| Obesity class 3                            | Binary            | 3,986   | 67,010     | European                 | 23563607              |
| BMI                                        | Continuous        | 249,796 |            | European                 | 20935630              |
| Waist-to-hip ratio                         | Continuous        | 224,459 |            | European                 | 25673412              |

\* Subjects from UK Biobank and 23AndMe were excluded

^ The genetic correlations with the TRD phenotypes were not estimated using LD Hub for these traits but using the software on a local machine because of the availability of significantly smaller datasets on LD Hub compared to the most recent studies

Definitions of obesity:

Obesity class 1: BMI  $\geq 30$  kg/m<sup>2</sup>

Obesity class 2: BMI  $\geq 35$  kg/m<sup>2</sup>

Obesity class 3: BMI  $\geq 40$  kg/m<sup>2</sup>

**Supplementary Table 4:** GWAS summary statistics used to create the polygenic risk scores (PRSs) in UKB and EXCEED (in EXCEED only PRS for major depressive disorder, schizophrenia and bipolar disorder were tested for association with depression defined using primary care data).

| Trait                                    | Type of phenotype | N cases | N controls | Ethnicity | Reference (PubMed ID) |
|------------------------------------------|-------------------|---------|------------|-----------|-----------------------|
| <b>Psychiatric disorders</b>             |                   |         |            |           |                       |
| Major depressive disorder*               | Binary            | 45,591  | 97,674     | European  | 29700475              |
| Schizophrenia                            | Binary            | 36,989  | 113,075    | European  | 25056061              |
| Bipolar disorder                         | Binary            | 20,352  | 31,358     | European  | 31043756              |
| Attention-deficit hyperactivity disorder | Binary            | 20,183  | 35,191     | European  | 30478444              |
| <b>Personality and related traits</b>    |                   |         |            |           |                       |
| Neuroticism                              | Continuous        | 63,030  |            | European  | 25993607              |
| Subjective wellbeing**                   | Continuous        | 298,420 |            | European  | 27089181              |
| <b>Cognitive traits</b>                  |                   |         |            |           |                       |
| Intelligence                             | Continuous        | 269,867 |            | European  | 29942086              |
| Childhood IQ                             | Continuous        | 12,441  |            | European  | 23358156              |

\* Subjects included in UK Biobank and 23AndMe were excluded from the analyses

\*\* 4,876 participants from UK Biobank were included in both this previous study and the present one

**Supplementary Table 5: (A)** results of the association analyses between the PRS of major depressive disorder (MDD), bipolar disorder and schizophrenia with depression diagnosis in UK Biobank primary care data (at least two or more diagnostic codes or at least one diagnostic code). For each measure of MDD, the number of cases and controls included in the analysis is shown in parenthesis. Results referred to the best p threshold ( $P_T$ ) are shown, but they were consistent across different p thresholds tested. Nagelkerke R2 was reported on the liability scale considering a prevalence of 10.8% (Lim et al., 2018) for the MDD definition based on primary care records ( $\geq$  two GP codes depression), while for the other MDD phenotypes we considered the relative prevalence compared to  $\geq$  two GP codes depression (e.g.  $\geq$  one GP code depression was 1.59 times more common than  $\geq$  two GP codes depression:  $10.8\% \times 1.59 = 17.17\%$ ). After Bonferroni correction,  $\alpha=2.16e-04$ . **(B)** Results of the association analyses between the PRS of major depressive disorder (MDD), bipolar disorder and schizophrenia with depression diagnosis in the EXCEED sample. After Bonferroni correction,  $\alpha=1.52e-03$ .

**A**

| Base data                 | Target trait                                        | Best $P_T$ | E (SE)       | P         | OR (95% CI)      | Nagelkerke R2 |
|---------------------------|-----------------------------------------------------|------------|--------------|-----------|------------------|---------------|
| Major depressive disorder | $\geq$ two GP codes depression (17,807 vs. 130,356) | 0.3        | 0.15 (0.008) | 2.73e-71  | 1.16 (1.14-1.17) | 0.0055        |
| Bipolar disorder          |                                                     | 0.5        | 0.07 (0.008) | 2.63e-17  | 1.07 (1.06-1.09) | 0.0012        |
| Schizophrenia             |                                                     | 1          | 0.09 (0.008) | 4.30e-25  | 1.09 (1.07-1.11) | 0.0018        |
| Major depressive disorder | $\geq$ one GP code depression (30,822 vs. 130,356)  | 0.5        | 0.14 (0.006) | 3.70e-100 | 1.15 (1.13-1.16) | 0.0056        |
| Bipolar disorder          |                                                     | 0.05       | 0.06 (0.006) | 3.92e-21  | 1.06 (1.05-1.08) | 0.0012        |
| Schizophrenia             |                                                     | 0.3        | 0.08 (0.007) | 4.98e-34  | 1.08 (1.07-1.10) | 0.0018        |
| Major depressive disorder | MHQ-depression (28,824 vs 83,203)                   | 0.4        | 0.13 (0.007) | 2.65e-84  | 1.14 (1.13-1.16) | 0.0060        |
| Bipolar disorder          |                                                     | 0.3        | 0.08 (0.007) | 1.60e-31  | 1.09 (1.07-1.10) | 0.0022        |
| Schizophrenia             |                                                     | 0.1        | 0.11 (0.007) | 5.70e-50  | 1.11 (1.10-1.13) | 0.0035        |
| Major depressive disorder | ICD depression (13,172 vs 293,833)                  | 0.2        | 0.15 (0.009) | 2.61e-63  | 1.16 (1.14-1.18) | 0.0044        |
| Bipolar disorder          |                                                     | 0.3        | 0.08 (0.009) | 2.89e-19  | 1.09 (1.07-1.11) | 0.0013        |
| Schizophrenia             |                                                     | 1          | 0.08 (0.009) | 4.54e-17  | 1.08 (1.06-1.10) | 0.0011        |
| Major depressive disorder | Smith depression (24,627 vs 64,476)                 | 0.5        | 0.14 (0.008) | 1.04e-74  | 1.15 (1.13-1.17) | 0.0065        |
| Bipolar disorder          |                                                     | 0.1        | 0.08 (0.008) | 2.06e-27  | 1.09 (1.07-1.10) | 0.0023        |
| Schizophrenia             |                                                     | 0.4        | 0.10 (0.008) | 4.34e-41  | 1.11 (1.09-1.13) | 0.0035        |
| Major depressive disorder | Self-rep. depression (25,932 vs 85,361)             | 0.5        | 0.16 (0.007) | 6.02e-106 | 1.17 (1.15-1.19) | 0.0080        |
| Bipolar disorder          |                                                     | 0.3        | 0.08 (0.007) | 4.79e-28  | 1.08 (1.07-1.10) | 0.0020        |
| Schizophrenia             |                                                     | 0.4        | 0.09 (0.007) | 7.09e-36  | 1.10             | 0.0026        |

|                           |                                              |     |              |           |                  |        |
|---------------------------|----------------------------------------------|-----|--------------|-----------|------------------|--------|
|                           |                                              |     |              |           | (1.08-1.11)      |        |
| Major depressive disorder | Seen GP or psychiatrist (135,947 vs 240,385) | 0.3 | 0.14 (0.003) | <1e-200   | 1.14 (1.14-1.15) | 0.0065 |
| Bipolar disorder          |                                              | 0.4 | 0.08 (0.004) | 2.32e-123 | 1.09 (1.08-1.09) | 0.0024 |
| Schizophrenia             |                                              | 0.4 | 0.10 (0.004) | 1.38e-176 | 1.11 (1.10-1.11) | 0.0034 |

**B**

| Base data                 | Target trait                               | Best P <sub>T</sub> | E (SE)      | P        | OR (95% CI)       | Nagelkerke R <sup>2</sup> |
|---------------------------|--------------------------------------------|---------------------|-------------|----------|-------------------|---------------------------|
| Major depressive disorder | ≥ 2 GP codes for depression (557 vs 2,181) | 0.2                 | 0.23 (0.05) | 6.05e-06 | 1.26 (1.14-1.39)  | 0.0124                    |
| Bipolar disorder          |                                            | 0.05                | 0.14 (0.05) | 0.0060   | 1.15 (1.04-1.26)  | 0.0045                    |
| Schizophrenia             |                                            | 0.05                | 0.11 (0.05) | 0.0276   | 1.12 (1.01- 1.23) | 0.0029                    |

**Supplementary Table 6:** overlap between MDD defined according to primary care data (at least two diagnostic codes for depression) with other depression measures in UK Biobank. The overlap between participants having no diagnostic code for depression and participants having at least one diagnostic code for depression is reported for comparison. For each pair of depression phenotypes (non-primary care vs. primary care), the number of subjects having depression according to both / total number of subjects having both depression measures is reported and the corresponding percentage in parenthesis. A Fisher's exact test was used to compare the difference in overlap between those having at least two diagnostic codes for depression, one diagnostic code for depression and no diagnostic code for depression. \* p values < Bonferroni corrected p value of 5e-3. GP=general practitioner.

| <b>Depression measure</b>              | <b>Overlap with &gt;= two depression diagnostic codes in primary care</b> | <b>Overlap with one depression diagnostic code in primary care</b> | <b>Overlap with no depression diagnostic code in primary care</b> | <b>Overlap in those with at least two vs. at least one depression diagnostic code</b> | <b>Overlap in those with at least two vs. no depression diagnostic code</b> |
|----------------------------------------|---------------------------------------------------------------------------|--------------------------------------------------------------------|-------------------------------------------------------------------|---------------------------------------------------------------------------------------|-----------------------------------------------------------------------------|
| ICD depression                         | 3380/17024 (19.85%)                                                       | 4863/31361 (15.51%)                                                | 2529/151412 (1.67%)                                               | OR=1.28 (1.22-1.34),<br>p=5.69e-24*                                                   | OR=11.89 (11.25-12.55),<br>p<2.2e-16*                                       |
| Smith depression                       | 3774/5013 (75.28%)                                                        | 6312/9159 (68.92%)                                                 | 9286/48234 (19.25%)                                               | OR=1.09 (1.04-1.15),<br>p=1.14 e-03*                                                  | OR=3.91 (3.73-4.10),<br>p<2.2e-16*                                          |
| Self-reported depression               | 4047/4616 (87.67%)                                                        | 6832/8412 (81.22%)                                                 | 7594/53485 (14.20%)                                               | OR=1.08 (1.02-1.14),<br>p=4.75e-03*                                                   | OR=6.17 (5.88-6.48),<br>p<2.2e-16*                                          |
| MHQ-defined depression                 | 3217/4444 (72.39%)                                                        | 5462/8180 (66.77%)                                                 | 10834/54317 (19.95%)                                              | OR=1.08 (1.02-1.15),<br>p=5.52e-03                                                    | OR=3.63 (3.45-3.82),<br>p<2.2e-16*                                          |
| Seen GP or psychiatrist for depression | 17301/19637 (88.10%)                                                      | 29714/36128 (82.25%)                                               | 49892/185601 (26.88%)                                             | OR=1.07 (1.04-1.10),<br>p=1.35e-07*                                                   | OR=3.28 (3.20-3.35),<br>p<2.2e-16*                                          |

**Supplementary Table 7:** Clinical and socio-demographic variables tested for association with treatment-resistant depression (TRD) compared to non-TRD in UKB; after Bonferroni correction  $\alpha=1.39e-03$ . Logistic regression (beta (SE) or OR (95% CI) are reported for continuous and binary predictors, respectively) or Kruskal-Wallis test were used.

| Variable                                                                  | TRD n=2,430                                                                                                                                                        | Non-TRD n=15,951                                                                                                                                                   | Effect size or statistics                                                                                                                                                         | p-value                                                  | N missing |
|---------------------------------------------------------------------------|--------------------------------------------------------------------------------------------------------------------------------------------------------------------|--------------------------------------------------------------------------------------------------------------------------------------------------------------------|-----------------------------------------------------------------------------------------------------------------------------------------------------------------------------------|----------------------------------------------------------|-----------|
| Number in household (>1/total)                                            | 577/2404 (24.00%)                                                                                                                                                  | 3726/15805 (23.57%)                                                                                                                                                | OR = 0.98 (0.88 – 1.08)                                                                                                                                                           | 0.65                                                     | 172       |
| Leisure - social activities (yes/total)                                   | 1511/2421 (62.41%)                                                                                                                                                 | 10377/15860 (65.43%)                                                                                                                                               | OR = 0.89 (0.81 – 0.97)                                                                                                                                                           | 0.007                                                    | 100       |
| Able to confide (where 0 is never and 5 is daily)                         | 3.14 (1.95)                                                                                                                                                        | 3.34 (1.92)                                                                                                                                                        | Kruskal-Wallis $\chi^2 = 23.52$                                                                                                                                                   | 1.25e-06                                                 | 570       |
| Frequency of visits from family/friends (0-7)                             | 2.69 (1.23)                                                                                                                                                        | 2.69 (1.17)                                                                                                                                                        | Kruskal-Wallis $\chi^2 = 13.87$                                                                                                                                                   | 0.031                                                    | 152       |
| Days/week of moderate physical activity*                                  | 3.33 (2.45)                                                                                                                                                        | 3.53 (2.40)                                                                                                                                                        | beta = -0.09 (0.02)                                                                                                                                                               | 1.39e-04                                                 | 1276      |
| Longstanding illness or disability yes/total **                           | 1534/2333 (65.75%)                                                                                                                                                 | 6906/15409 (44.82%)                                                                                                                                                | OR = 2.26 (2.06 – 2.49)                                                                                                                                                           | 5.45e-64                                                 | 639       |
| Education (% per category)***                                             | College: 22.22%<br>A-levels: 11.79%<br>0-levels-GCSEs: 22.72%<br>CSEs: 7.10%<br>NVQ-HND-HNC: 6.15%<br>Other professional title: 5.23%<br>None of the above: 24.79% | College: 27.84%<br>A-levels: 11.28%<br>0-levels-GCSEs: 22.42%<br>CSEs: 6.62%<br>NVQ-HND-HNC: 7.09%<br>Other professional title: 5.34%<br>None of the above: 19.47% | OR = 0.64 (0.56 – 0.73)<br>OR = 0.84 (0.72 – 0.98)<br>OR = 0.80 (0.70 – 0.91)<br>OR = 0.86 (0.71 – 1.05)<br>OR = 0.70 (0.58 – 0.85)<br>OR = 0.77 (0.63 – 0.95)<br>Reference level | 1.61e-11<br>0.029<br>0.00076<br>0.13<br>0.00033<br>0.014 | 239       |
| Average household income £ (% per category)                               | <18K: 41.98%<br>18K-30.9K: 26.28%<br>31K-51.9K: 20.67%<br>52K-100K: 10.14%<br>>100K: 0.94%                                                                         | <18K: 31.01%<br>18K-30.9K: 26.90%<br>31K-51.9K: 24.17%<br>52K-100K: 15.23%<br>>100K: 2.69%                                                                         | Reference level<br>OR = 0.72 (0.64 – 0.81)<br>OR = 0.63 (0.56 – 0.72)<br>OR = 0.49 (0.42 – 0.58)<br>OR = 0.26 (0.16 – 0.41)                                                       | 4.62e-08<br>7.08e-13<br>5.81e-18<br>1.13e-08             | 2793      |
| <b>Personality traits at baseline (available in the whole UKB cohort)</b> |                                                                                                                                                                    |                                                                                                                                                                    |                                                                                                                                                                                   |                                                          |           |
| “Are you often troubled by feelings of guilt?” (yes/total)                | 1366/2350 (58%)                                                                                                                                                    | 7248/15419 (47%)                                                                                                                                                   | OR = 1.56 (1.43 – 1.71)                                                                                                                                                           | 1.63e-23                                                 | 612       |
| “Do you often feel lonely?” (yes/total)                                   | 1190/2369 (50.23%)                                                                                                                                                 | 5819/15543 (37.43%)                                                                                                                                                | OR = 1.69 (1.55 – 1.84)                                                                                                                                                           | 3.98e-32                                                 | 469       |

|                                                                       |                    |                      |                         |          |      |
|-----------------------------------------------------------------------|--------------------|----------------------|-------------------------|----------|------|
| "Are your feelings easily hurt?" (yes/total)                          | 1898/2365 (80.25%) | 11383/15521 (73.34%) | OR = 1.48 (1.33 – 1.64) | 1.01e-12 | 495  |
| "Do you ever feel 'just miserable' for no reason?" (yes/total)        | 1984/2393 (82.91%) | 11227/15650 (71.74%) | OR = 1.91 (1.71 – 2.14) | 8.72e-30 | 338  |
| "Are you an irritable person?" (yes/total)                            | 1197/2297 (51.11%) | 6278/15060 (41.69%)  | OR = 1.52 (1.39 – 1.66) | 8.44e-21 | 1024 |
| "Does your mood often go up and down?" (yes/total)                    | 2057/2397 (85.82%) | 11571/15635 (74.01%) | OR = 2.12 (1.88 – 2.40) | 9.97e-35 | 349  |
| "Would you call yourself a nervous person?" (yes/total)               | 1201/2339 (51.35%) | 5930/15385 (38.54%)  | OR = 1.68 (1.54 – 1.84) | 1.64e-31 | 657  |
| Neuroticism score                                                     | 7.97 (3.15)        | 6.35 (3.30)          | beta = 0.46 (0.03)      | 3.0e-66  | 4089 |
| "Would you describe yourself as someone who takes risks?" (yes/total) | 585/2327 (25.14%)  | 3982/15245 (26.12%)  | OR = 0.95 (0.86 – 1.05) | 0.32     | 809  |

\* adjusted for age and sex; no longer significant if adjusted also for long-term disability or illness (p=3.29e-03)

\*\* adjusted for age, sex, BMI and ever smoked

\*\*\* adjusted for age and sex

**Supplementary Table 8:** psychiatric comorbidities in patients with treatment-resistant depression (TRD) vs. non-TRD according to primary care records in UKB.

| <b>Comorbidities</b>          | <b>TRD (n=2,430)</b> | <b>Non-TRD (n=15,951)</b> | <b>Effect size</b>  | <b>P value</b> |
|-------------------------------|----------------------|---------------------------|---------------------|----------------|
| Anxiety disorders             | 997 (41.03%)         | 4290 (26.89%)             | OR=1.89 (1.73-2.07) | 1.25e-45       |
| Depression with anxiety       | 904 (37.20%)         | 4950 (31.03%)             | OR=1.32 (1.20-1.44) | 1.30e-09       |
| Obsessive-compulsive disorder | 60 (2.47%)           | 132 (0.083%)              | OR=3.03 (2.23-4.13) | 1.69e-12       |
| Somatoform disorders          | 195 (8.02%)          | 860 (5.39%)               | OR=1.53 (1.30-1.80) | 2.43e-07       |
| Stress-related disorders      | 196 (8.07%)          | 1014 (6.36%)              | OR=1.29 (1.10-1.52) | 0.0016         |
| Eating disorders              | 45 (1.85%)           | 127 (0.080%)              | OR=2.35 (1.67-3.31) | 1.02e-06       |
| Sleep disorders               | 83 (3.42%)           | 304 (1.91%)               | OR=1.82 (1.42-2.33) | 1.93e-06       |
| Personality disorders         | 55 (2.26%)           | 147 (0.092%)              | OR=2.49 (1.82-3.40) | 1.09e-08       |
| Self-harm/suicidal behaviours | 132 (5.43%)          | 438 (2.28%)               | OR=2.03 (1.67-2.48) | 2.99e-12       |



**Supplementary Table 9:** frequency of psychotropic drug combinations (A), type of antidepressant drug combinations (B) and combinations based on drug classes (C) in UKB. Antidepressant augmentation with any antipsychotic or a mood stabilizer among lithium, valproate, lamotrigine and pregabalin were considered in patients with TRD and non-TRD. Only combinations prescribed for longer than 30 days were considered. When considering specific drug or class combinations, only those prescribed to > 15 subjects were considered. Fisher's exact test was used for comparisons because of the small size of some of the groups. Bonferroni corrected p values was 2.38e-03 and 1.43e-03 for the comparisons in B and C, respectively.

\* significant difference between TRD and non-TRD.

### A

| Drug combination                  | TRD (n=2430)  | Non-TRD (n=15951) | Statistics                        |
|-----------------------------------|---------------|-------------------|-----------------------------------|
| Antidepressant combination        | 1128 (46.42%) | 1307 (8.19%)      | OR=5.66 (5.17-6.21), p=4.03e-289* |
| Augmentation with antipsychotic   | 354 (14.57%)  | 576 (3.61%)       | OR=4.03 (3.50-4.65), p=2.95e-75*  |
| Augmentation with mood stabilizer | 326 (13.42%)  | 406 (2.55%)       | OR=5.27 (4.51-6.15), p=4.33e-90*  |

### B

| Drug combination          | TRD          | Non-TRD      | Statistics                        |
|---------------------------|--------------|--------------|-----------------------------------|
| amitriptyline-citalopram  | 198 (17.55%) | 266 (20.35%) | OR=0.86 (0.70-1.06), p=0.15       |
| amitriptyline-fluoxetine  | 144 (12.77%) | 245 (18.75%) | OR=0.68 (0.54-0.85), p=6.56e-04*  |
| amitriptyline-mirtazapine | 73 (6.47%)   | 49 (3.75%)   | OR=1.73 (1.17-2.55), p=3.87e-03   |
| amitriptyline-paroxetine  | 32 (2.84%)   | 39 (2.98%)   | OR=0.95 (0.57-1.57), p=0.90       |
| amitriptyline-duloxetine  | 16 (1.42%)   | 12 (0.92%)   | OR=1.54 (0.68-3.59), p=0.26       |
| amitriptyline-sertraline  | 112 (9.93%)  | 121 (9.26%)  | OR=1.07 (0.81-1.42), p=0.63       |
| amitriptyline-venlafaxine | 58 (5.14%)   | 8 (3.67%)    | OR=8.39 (3.97-20.44), p=4.69e-12* |
| citalopram-dosulepin      | 20 (1.77%)   | 7 (0.54%)    | OR=3.31 (1.34-9.30), p=5.62e-03   |
| citalopram-fluoxetine     | 60 (5.32%)   | 30 (2.30%)   | OR=2.32 (1.46-3.75), p=1.51e-04*  |
| citalopram-mirtazapine    | 50 (4.43%)   | 58 (4.44%)   | OR=1 (0.66-1.50), p=1             |
| citalopram-sertraline     | 41 (3.63%)   | 32 (2.45%)   | OR=1.48 (0.91-2.45), p=0.12       |
| citalopram-venlafaxine    | 16 (1.42%)   | 6 (0.05%)    | OR=3.09 (1.14-9.67), p=0.017      |
| fluoxetine-mirtazapine    | 33 (2.93%)   | 25 (1.91%)   | OR=1.53 (0.88-2.70), p=0.14       |
| fluoxetine-sertraline     | 49 (4.34%)   | 11 (0.084%)  | OR=5.16 (2.63-11.06), p=4.83e-08* |

|                         |            |             |                                      |
|-------------------------|------------|-------------|--------------------------------------|
| mirtazapine-sertraline  | 46 (4.08%) | 38 (2.91%)  | OR=1.40 (0.89-2.23), p=0.15          |
| mirtazapine-venlafaxine | 82 (7.27%) | 65 (4.97%)  | OR=1.46 (1.03-2.08), p=0.027         |
| trazodone-citalopram    | 13 (1.15%) | 18 (1.38%)  | OR=0.84 (0.38-1.82), p=0.72          |
| trazodone-fluoxetine    | 14 (1.24%) | 19 (1.45%)  | OR=0.85 (0.39-1.81), p=0.73          |
| trazodone-venlafaxine   | 16 (1.42%) | 12 (0.092%) | OR=1.54 (0.68-3.59), p=0.26          |
| venlafaxine-citalopram  | 16 (1.42%) | 12 (0.092%) | OR=1.54 (0.68-3.59), p=0.26          |
| venlafaxine-sertraline  | 16 (1.42%) | 3 (0.022%)  | OR=6.17 (1.76-33.17),<br>p=9.35e-04* |

### C

| Drug combination   | TRD          | Non-TRD      | Statistics                          |
|--------------------|--------------|--------------|-------------------------------------|
| SNRI-NaSSA         | 97 (5.93%)   | 64 (4.45%)   | OR=1.33 (0.95-1.87), p=0.09         |
| SNRI-SARI          | 29 (1.78%)   | 23 (1.60%)   | OR=1.11 (0.62-2.01), p=0.78         |
| SNRI-SNRI          | 16 (0.98%)   | 2 (0.14%)    | OR=7.09 (1.65-63.08),<br>p=0.0031   |
| SSRI-NaSSA         | 165 (10.08%) | 128 (8.91%)  | OR=1.13 (0.88-1.45), p=0.33         |
| SSRI-phenothiazine | 19 (1.16%)   | 8 (0.06%)    | OR=2.08 (0.87-5.52), p=0.08         |
| SSRI-SARI          | 70 (4.28%)   | 68 (4.73%)   | OR=0.90 (0.63-1.29), p=0.60         |
| SSRI-SNRI          | 126 (7.70%)  | 59 (4.11%)   | OR=1.87 (1.35-2.62),<br>p=7.33e-05* |
| SSRI-SSRI          | 195 (11.91%) | 105 (7.31%)  | OR=1.63 (1.27-2.11),<br>p=9.75e-05* |
| TCA-NaSSA          | 94 (5.74%)   | 63 (4.38%)   | OR=1.31 (0.93-1.85), p=0.12         |
| TCA-SARI           | 41 (2.50%)   | 26 (1.81%)   | OR=1.38 (0.82-2.37), p=0.22         |
| TCA-SNRI           | 119 (7.27%)  | 99 (6.89%)   | OR=1.06 (0.79-1.41), p=0.73         |
| TCA-SSRI           | 594 (36.29%) | 760 (52.89%) | OR=0.69 (0.60-0.78),<br>p=9.17e-09* |
| TCA-TCA            | 72 (4.40%)   | 32 (2.23%)   | OR=1.97 (1.28-3.12),<br>p=0.0013*   |
| NaSSA-atypical AP  | 63 (10.29%)  | 75 (9.99%)   | OR=1.03 (0.71-1.49), p=0.93         |
| NaSSA-typical AP   | 26 (4.25%)   | 29 (3.86%)   | OR=1.10 (0.62-1.96), p=0.78         |
| SARI-atypical AP   | 20 (3.27%)   | 15 (2.0%)    | OR=1.64 (0.79-3.47), p=0.17         |
| SARI-typical AP    | 26 (4.25%)   | 17 (2.26%)   | OR=1.88 (0.97-3.72), p=0.06         |
| SNRI-atypical AP   | 66 (10.78%)  | 84 (11.19%)  | OR=0.96 (0.68-1.37), p=0.96         |
| SNRI-typical AP    | 49 (8.01%)   | 46 (6.13%)   | OR=1.31 (0.84-2.03), p=0.24         |
| SSRI-atypical AP   | 97 (15.85%)  | 124 (16.51%) | OR=0.96 (0.71-1.29), p=0.83         |
| SSRI-typical AP    | 131 (21.41%) | 215 (28.63%) | OR=0.75 (0.58-0.96), p=0.021        |
| TCA atypical AP    | 40 (6.54%)   | 35 (4.60%)   | OR=1.40 (0.86-2.30), p=0.16         |
| TCA typical AP     | 94 (15.36%)  | 111 (14.78%) | OR=0.82 (0.76-1.41), p=0.82         |
| NaSSA-lithium      | 31 (6.11%)   | 18 (3.11%)   | OR=1.97 (1.05-3.78), p=0.028        |
| NaSSA-pregabalin   | 46 (9.07%)   | 28 (4.84%)   | OR=1.88 (1.13-3.16), p=0.011        |

|                  |              |              |                                      |
|------------------|--------------|--------------|--------------------------------------|
| SARI-lithium     | 16 (3.16%)   | 8 (1.38%)    | OR=2.28 (0.91-6.21), p=0.06          |
| SNRI-lithium     | 46 (9.07%)   | 36 (6.22%)   | OR=1.46 (0.91-2.36), p=0.11          |
| SNRI-pregabalin  | 47 (9.27%)   | 43 (7.43%)   | OR=1.25 (0.79-1.97), p=0.32          |
| SSRI-lamotrigine | 23 (4.54%)   | 15 (2.59%)   | OR=1.75 (0.86-3.65), p=0.10          |
| SSRI-lithium     | 61 (12.03%)  | 27 (4.66%)   | OR=2.58 (1.59-4.29),<br>p= 5.31e-05* |
| SSRI-pregabalin  | 134 (26.43%) | 148 (25.56%) | OR=1.03 (0.79-1.36), p=0.84          |
| SSRI-valproate   | 27 (5.33%)   | 25 (4.32%)   | OR=1.23 (0.68-2.25), p=0.48          |
| TCA-lithium      | 43 (8.48%)   | 32 (5.53%)   | OR=1.53 (0.93-2.55), p=0.09          |
| TCA-pregabalin   | 84 (16.57%)  | 119 (2.06%)  | OR=0.80 (0.59-1.10), p=0.17          |
| TCA-valproate    | 21 (4.12%)   | 8 (1.38%)    | OR=2.99 (1.26-7.89),<br>p=0.0076     |

**Supplementary Table 12:** results of the association analyses between the PRS of interest and the risk of treatment-resistant depression (TRD) vs. non-TRD in UKB. Nagelkerke R2 is reported on the observed scale since the comparison is referred to cases only. \*significant results after Bonferroni correction ( $p=5.81e-04$ ).  $P_T$  = p threshold.

| Base data                                | Best $P_T$ | E (SE)       | P         | OR (95% CI)      | Nagelkerke R2 |
|------------------------------------------|------------|--------------|-----------|------------------|---------------|
| Major depressive disorder                | 0.001      | 0.05 (0.02)  | 0.028     | 1.05 (1.01-1.10) | 5.36e-04      |
| Attention-deficit hyperactivity disorder | 0.2        | 0.08 (0.02)  | 4.38e-04* | 1.09 (1.04-1.14) | 1.38e-03      |
| Schizophrenia                            | 0.1        | 0.04 (0.02)  | 0.14      | 1.04 (0.99-1.09) | 2.48e-04      |
| Bipolar disorder                         | 0.01       | 0.04 (0.02)  | 0.07      | 1.04 (0.99-1.09) | 3.74e-04      |
| Neuroticism                              | 0.01       | 0.06 (0.02)  | 7.42e-03  | 1.06 (1.02-1.11) | 7.98e-04      |
| Subjective well-being                    | 0.2        | -0.08 (0.02) | 1.32e-03  | 0.93 (0.89-0.97) | 1.15e-03      |
| Intelligence                             | 0.1        | -0.09 (0.02) | 3.08e-04* | 0.92 (0.87-0.96) | 1.45e-03      |
| Childhood IQ                             | 0.05       | -0.02 (0.02) | 0.50      | 0.98 (0.94-1.03) | 5.02e-05      |
